# Supplementary material for: Identification of Metabolites and Transcripts Involved in Salt Stress and Recovery in Peanut
Source: Front Plant Sci. 2018 Feb 22;9:217. doi: 10.3389/fpls.2018.00217 (PMC5827294; doi:10.3389/fpls.2018.00217)
Supplement: Table S1 — The processed and normalized metabolite data. [file Table1.XLSX]

## Sheet: Shoot
Peak	Mass	CKS1	CKS2	CKS3	CKS4	CKS5	CKS6	NaClS1	NaClS2	NaClS3	NaClS4	NaClS5	NaClS6	RecoverS1	RecoverS2	RecoverS3	RecoverS4	RecoverS5	RecoverS6	RT(min)
1,2-Cyclohexanedione	188	0	0	1.91888	0	1.4679	0	0	0	0	1.492	1.46242	1.45515	0.646166	1.21641	1.07273	1.06669	0	1.32624	15.5446
1,4-Cyclohexanedione	359	0	0	0	0	0	0	0	0	0	5.60289	2.09867	0	2.24159	3.3225	1.82935	6.1772	4.09243	5.10884	26.9661
1,4-Dihydroxy-2-naphthoic acid	404	0	0	0	0	0	0	2.50465	0	0	6.77681	5.96667	6.11332	0	0	1.22483	3.75376	7.82304	7.12436	34.824
1,5-Anhydroglucitol	204	4.04107	3.95746	3.57671	2.71762	2.92542	2.97872	2.55888	4.28824	2.40831	1.60091	2.09803	2.90496	2.66725	3.86159	3.7552	1.96502	2.08824	2.16809	41.1767
1-Aminocyclopropanecarboxylic acid	221	0	0	0.178834	0.141306	0.134001	0.0974934	0.0390463	0	0.0785937	0.0434507	0.0609986	0.0553171	0.0868981	0.0513149	0.0839148	0.0589612	0.0260104	0.0123274	8.76024
1-Hexadecanol	299	0	0	0	0	0	0	0	0	0	2.48409	3.38813	0	0	0.956222	0.798159	1.5005	2.26965	2.29918	20.6589
1-Kestose	217	65.8196	47.5019	63.4403	133.812	101.827	82.405	213.926	207.039	130.894	144.349	177.654	146.708	159.519	214.719	196.175	147.562	239.981	188.88	23.4869
1-Methylhydantoin	258	99.5155	92.8681	115.531	83.3031	84.0845	77.1301	54.6432	57.4369	60.8618	47.3509	41.3388	35.3193	58.0677	49.0423	50.0033	41.0123	33.3871	33.619	7.24123
1-Monopalmitin	57	0	0	0.0773991	0	0	0	0.153812	0	0	0.0994354	0.139644	0.108574	0	0.118574	0.212191	0.179729	0.219762	0.0982207	38.7645
2,4-diaminobutyric acid	219	4.01413	0	4.34423	0	4.20006	3.49012	4.54062	4.13148	3.62933	2.80818	2.93827	2.9347	2.31224	3.10983	2.92653	2.70278	0	3.22498	16.8594
21-hydroxypregnenolone	418	0	0	0	0	0	0	0	0	0	2.80513	2.72651	2.7592	0	1.40689	0	1.81165	3.28673	3.03826	35.8158
22-Ketocholesterol	173	0	0	0	0	0.22754	0	0	0	0	0.912414	0.98763	0.440529	0.855607	0.438309	0.348807	1.05766	1.28301	1.00291	30.3346
24,25-dihydrolanosterol	159	0	0	0	0	0.155598	0	0	0	0	0.180907	0.205436	0	0.115244	0.193322	0.163879	0.178649	0.226343	0.220818	36.6029
2-amino-2-methylpropane-1,3-diol	130	0.75395	1.16728	0.767045	0.806399	0.56503	0.883651	0	0	0.63804	0	0	0.268074	0.371224	0	0.353724	0	0.0603977	0.286123	20.3308
2-aminoethanethiol	130	8.994	8.00161	11.1296	8.01689	8.4394	6.46683	4.65826	4.50573	4.82635	3.74469	3.47153	2.80946	4.60395	3.58204	4.25094	3.13702	2.46553	0	7.38334
2'-deoxyadenosine	207	0	0	0	0	0.257233	0	0.713532	0	0	0	0.124555	0	0	0.275206	0.413365	0.36089	0.434692	0.291685	39.3236
2-ketobutyric acid	89	0	0	0	0	0.104915	0	0	0	0	0.0922026	0.137423	0	0.12153	0.179665	0.135814	0.18486	0.186473	0.178595	5.40023
2-Keto-L-gulonic acid	84	0	0	0	0	0	0	0	0	0	0.453815	0.496234	0.373552	0.895864	0.931979	1.0238	0.939884	0.81046	0.932884	9.76608
2-methylfumarate	259	0	0	0	0	0	0	0	0	0	0.136997	0.145294	0	0.0498777	0.303188	0.276083	0.200438	0.219934	0.24655	12.6972
3,6-Anhydro-D-galactose	159	0	0	0	0	0	0	0	0	0.4034	0.433042	0	0	0.540217	0.612803	0.567768	0.641539	0.555382	0.514141	23.0951
3-Cyanoalanine	141	9.43776	16.0912	15.0543	19.1773	15.442	14.9915	4.46838	6.07272	3.62672	5.32943	6.21009	4.51385	1.47835	2.15994	2.59701	7.71017	4.91088	6.6375	12.1677
3-hydroxybutyric acid	147	0	0	0	0	0	0	0	0	0	0.709451	0.669988	0.580264	0.427914	0.592102	0.454806	0.438672	0.565079	0.493022	7.89638
3-hydroxy-L-proline	230	4.98693	4.94056	4.20395	0	5.78284	5.01192	6.31361	5.51254	0	3.99147	3.97724	4.63008	3.06788	3.10408	3.06279	4.38277	4.80062	4.74739	15.9668
3-Hydroxypropionic acid	103	0.967146	0.971052	0	0	0	0	1.35135	1.18867	0	0	0	0	1.06203	0	0	0.956324	1.15501	1.04605	18.0938
3-Indoleacetonitrile	132	0	0	0.316929	0	0.322797	0	0	0	0	0	0.168881	0	0	0.195658	0	0.126475	0.0911743	0.126932	26.9329
3-Methylamino-1,2-propanediol	72	0	0	0	0	0	0	0.648101	0.175071	0.969082	0	0	0.779811	0.469934	0	0	0	0	0	23.6738
4-aminobutyric acid	174	35.3479	0	0	18.7434	6.46459	0	0	0	17.6874	5.56099	6.74418	0	23.7224	35.3761	28.8976	38.5866	41.668	41.8423	15.9433
4-Hydroxy-6-methyl-2-pyrone	183	0	0	0	0	0	0	0	0	0	0.728041	0.618746	0	0	0	0	0.995914	0.880027	0.849601	10.2694
4-hydroxybutyrate	89	2.08589	1.82101	2.29734	1.89353	1.53607	1.2614	1.01512	0	0.923468	0.688635	0.811389	0.710123	0.334391	0.394526	0.426424	0.559676	0.580924	0.660529	12.5831
4-hydroxycinnamic acid	219	2.98983	0	3.10514	4.36544	3.84795	3.87736	2.96519	3.05906	3.23166	3.67024	3.88525	3.83113	3.60894	2.66808	2.8792	3.31163	3.35356	3.48734	26.0187
4-Hydroxymandelic acid	245	0.235979	0	0	0	0.126417	0	0.125021	0	0	0.051957	0.0539495	0	0.0703926	0.0691908	0.0862072	0.0806425	0	0.0879224	15.4268
4-Hydroxyquinazoline	203	0	0	2.03371	0	6.25567	0	26.6624	18.7842	2.91157	7.98412	5.43899	7.47202	5.3377	16.1394	10.5282	9.93362	18.2683	17.1143	26.1497
4-Vinylphenol dimer	192	0	0	2.62706	0	2.09506	0	0	0	0	0.992217	0.861474	0	0	0.939919	0	0.93908	0.760602	0	9.82199
5,6-dihydrouracil	171	0	0	0	0	1.64605	0	0.9175	0	0	0	0.262213	0	0	5.4692	0.771971	0	0.776857	0.818486	22.0613
5,6-Dimethylbenzimidazole	203	0	0	0	0	0	0	0	0	0	0	1.56332	1.82466	1.15746	3.22876	2.37621	0	3.57364	3.63404	24.2621
5-Dihydrocortisone	205	12.4983	12.8039	12.1975	8.02704	9.86962	9.76998	2.44537	2.71914	2.49412	0.270203	0.342285	0.672404	0.670986	0.437404	1.21433	0.185689	0.1424	0.119355	35.3414
5-Hydroxyindole-3-acetic acid	174	0	0	0	0	0	0	0	0	0	0.14877	0.291292	0.181641	0.0972832	0.130087	0.10582	0	0	0	20.4218
5-hydroxytryptophan	202	0	0	0	0	0	0	0.478289	0	0	0.973098	1.28887	1.91938	1.35609	1.57534	1.65602	0.874701	1.43774	1.61652	32.66
5-Methoxyindole-3-acetic acid	232	0	0	1.50994	0	1.56682	1.31434	0	0	1.6382	1.79753	1.77283	1.65879	1.6562	1.74812	1.62845	1.70288	1.87879	1.81815	16.5817
5-Methoxytryptamine	174	19.0415	13.158	14.877	12.1072	32.9662	30.0932	0.746772	0	11.6762	13.5284	11.3413	9.38858	25.5759	7.67397	5.71442	17.5327	9.46376	7.13177	23.6186
5'-methylthioadenosine	188	0	0	0	0	0	0	0	0	0	0.0954489	0.0764483	0	0	0.159776	0	0.162077	0.182653	0.187572	41.888
6-hydroxy caproic acid trimer	187	0	0	0	0	0	0	0	0	0	0.0256088	0.0234701	0	0	0.0322783	0	0.0294818	0.0328628	0	6.49782
6-Methylmercaptopurine	221	0	0	0.274349	0.234293	0	0	0	0	0	0.0710252	0	0	0.0928137	0	0	0.0770264	0	0	11.1017
8-Aminocaprylic acid	174	0	0	0	0	0	0	0	0	0	1.39264	1.66321	1.38946	1.38849	2.50383	2.05324	2.30776	3.78073	3.2062	39.1894
acetanilide	59	0	0	0	0	0.150804	0	0	0	0	0	0.182232	0.0640242	0	0.237262	0.232193	0.223952	0.305381	0.281768	5.22604
Acetol	219	0	0	0.12756	0	0.0817177	0	0	0	0	0.190101	0	0	0.108179	0.112452	0	0	0	0	7.60749
adenosine	230	8.33693	8.84183	10.8067	14.0147	12.3052	10.076	13.7368	15.3433	8.87396	9.93039	11.4863	11.9817	6.4734	14.8572	13.178	13.3124	16.1407	15.3119	39.7439
adipic acid	159	0	0	0	0	0	0	0	0	0	0.341596	0.419672	0	0.711103	0.750982	0.412724	0.886081	0.77574	0.698064	22.5853
adrenaline	355	0	0	0	0	0	0	2.36313	0	0	2.05277	1.61383	0	0	2.21932	1.32165	0	4.34293	4.10304	40.8384
alanine	116	34.8375	32.8105	51.5908	41.3332	56.1899	29.5381	32.3853	21.6904	20.2256	34.3647	29.8035	18.449	24.3843	41.8287	32.39	44.2525	50.1328	48.306	6.90485
Albendazole	220	0	0	0	0	0	0	0	0	0	0.22557	0	0	0	0.267424	0.287728	0.31728	0.386966	0.0499544	22.9869
Allantoic acid	189	0	0	1.98267	1.09008	6.0793	0	0	0	0	6.37222	6.25884	3.7145	3.43121	6.51953	5.48856	7.08106	8.2916	7.814	29.552
Allo-inositol	217	2.01886	1.92157	2.2136	1.88982	1.89696	1.74955	1.91657	2.08906	1.9417	1.2271	1.24686	1.19355	0	1.39996	1.48344	1.33667	1.32538	1.15697	28.5073
alpha-Aminoadipic acid	128	0.56176	0.760261	0.655992	0.238929	0.147945	0.0526973	0.493089	0	0.368876	1.71995	2.12378	1.83223	0.287289	0.37334	0.298598	0.432118	0.610862	0.496244	20.8243
alpha-D-glucosamine-phosphate	168	0	0	0	0	0	0	0	0	0	0.398844	0.30931	0.24798	0.0838434	0.416449	0.104975	0.919477	1.22821	1.43387	40.8526
alpha-Ecdysone	204	1.6869	1.60963	1.3843	0	0	1.51908	2.49425	3.06532	2.01243	1.38507	0	1.41983	1.17075	0	1.52834	1.12405	1.17951	1.44839	39.7781
alpha-ketoglutaric acid	89	0.686318	1.3534	0.556007	0.502318	0.572809	0.446493	0.741657	0	0.63298	0.239999	0.387145	0.298533	0	0.376165	0.444483	0	0.327827	0.287662	17.246
Aminooxyacetic acid	89	1.54336	1.29942	1.71007	1.32795	1.68219	1.45385	1.1831	1.29772	1.11835	0.690753	0.469464	0.456274	0.843281	0.565138	0.593053	0.388734	0.349763	0.341985	7.56527
asparagine	116	744.978	747.684	763.879	721.702	907.687	927.969	532.871	401.015	601.516	1086.63	1009.53	924.399	1158.56	777.834	897.968	1063.66	824.071	765.841	19.7908
aspartic acid	232	167.849	178.67	179.267	125.103	155.76	117.991	204.222	148.84	200.919	57.6899	50.9143	54.0494	72.5147	66.5629	63.2082	65.8981	60.454	60.2551	15.8491
beta-Alanine	174	0	0	0	0	0	0	1.01754	0	0	2.70336	3.16782	2.49637	1.03731	1.63607	1.40318	1.56444	1.96533	1.74846	13.4095
beta-Mannosylglycerate	204	78.9296	79.3826	92.3982	122.115	118.736	95.7558	233.288	272.684	148.337	248.288	135.387	248.355	175.252	249.031	166.942	299.042	285.688	319.378	23.7558
Bis(2-hydroxypropyl)amine	70	0	0	0	0	1.37918	0	43.5771	21.2111	24.8374	49.855	119.497	98.318	95.3013	124.214	104.821	32.0886	111.123	85.9092	8.09923
Biuret	401	0	0	0	0	0	0	0	0	0	9.78058	4.36795	6.90299	2.93767	8.5448	3.425	16.6828	18.0718	19.4372	39.2149
caffeic acid	219	1.99572	1.9021	1.38388	0.711054	0.827233	0.945311	1.19895	2.54911	1.8347	2.76131	2.28693	3.63275	5.0442	4.35022	4.35842	3.70708	3.87726	3.37378	30.6593
carbamoyl-aspartic acid	245	0	0	0	0	1.03654	0	0	0	1.00037	0.880988	0	0.830361	0.791057	0	0.922672	0	0.861203	0.879399	26.3
Carbazole	167	81.8352	63.2799	101.437	54.5959	70.0483	76.3651	191.954	154.625	226.788	189.858	248.835	176.563	199.009	246.179	214.769	167.872	249.285	239.889	16.8475
cellobiose	73	0	0	0	0	0	0	0	0	0	1.49174	0	2.01851	0	2.61141	0	0	1.68265	1.04524	37.8671
cis-1,2-Dihydronaphthalene-1,2-diol	72	0	2.90769	0	0	0	0.604804	0	0	0	0	0.285656	0.764035	0	0	0	0.664263	0	0	18.351
Citraconic acid	218	1.12853	0	0	0.835174	0.699511	0	0	0	0	0	0	1.02432	0	0	0	0.447538	0	0	16.7239
Citramalic acid	259	2.54872	2.53307	2.97044	2.43047	2.4189	1.79292	2.24528	1.78056	1.77753	1.52169	1.63871	1.53556	2.91225	3.27623	2.97212	2.10426	1.99893	1.95584	15.5325
citric acid	217	65.0642	43.5987	0	96.2503	86.8379	50.8302	204.278	128.492	116.228	114.8	120.212	93.7413	0	204.132	148.718	209.184	0	232.023	23.6996
citrulline	157	1.83319	0	2.27932	3.06408	3.83116	5.06446	1.77258	0	0	11.1773	12.8524	4.63942	9.96988	10.9071	5.21625	14.0218	14.6917	13.4602	23.5502
creatine	84	3.83794	3.43542	3.99753	0	2.84633	2.78309	2.41845	0	2.40582	3.42421	3.45303	3.04379	4.21711	4.89289	4.36492	5.35695	5.4146	5.24032	7.97185
creatine degr	147	3.89936	4.32492	5.33703	6.01195	5.5856	5.94403	4.86364	6.41595	4.49169	2.43573	2.66212	2.59753	2.94921	2.52551	2.95088	2.53133	2.37083	2.46714	5.7628
Cumic Acid	221	0	0	0.979479	0.942258	0.924062	0.752103	0.577294	0	0.573407	0.478806	0.580887	0.454444	0.604615	0.569941	0.62868	0.594708	0.641948	0.303254	6.33233
cycloleucine	168	390.455	300.809	410.542	223.949	287.252	294.398	978.282	890.174	1400.32	469.201	608.43	408.542	658.627	603.054	699.064	201.962	475.612	426.837	16.7069
Cysteinylglycine	168	1443.17	1502.01	1564.9	1148.16	1068.88	1124.55	554.731	493.769	648.378	817.732	683.879	784.893	669.403	683.363	604.447	687.524	496.677	465.574	22.0049
cytidine-monophosphate degr prod	259	0	0	0	0	0	0	0	0	0	0.697265	0.470814	0.633003	1.2643	0.810976	1.03126	1.25292	0.77235	0.824235	47.7123
D-(glycerol-phosphate)	299	0	0	0	0	0	0	3.8311	0	3.64663	7.63993	8.22718	7.91993	4.42821	7.56097	5.97357	7.51287	8.84053	8.25904	22.3164
D-alanyl-D-alanine	188	0	0	0	0	0	0	0	0	0	2.73271	3.20816	0	3.45316	2.97441	3.13538	3.87948	3.26216	2.80497	23.3484
D-Arabitol	217	5.92307	6.00404	6.18415	7.20391	7.19007	5.56197	6.58716	8.54519	5.97201	3.91279	4.89639	4.07539	4.59002	4.14781	5.37412	3.67494	5.64753	5.52156	20.6996
Dehydroascorbic Acid	173	0	0	0	0	0.280252	0	0.647651	0	0	0.364587	0.40053	0.397577	0.481854	0.548311	0.456075	0	0.584828	0.556049	39.5166
D-erythronolactone	159	0	0	0	0	0	0	0	0	0	0.262757	0.270091	0	0.321477	0.311091	0.312668	0.380966	0.36251	0.335443	34.5758
D-erythro-sphingosine	204	17.1836	15.938	15.2767	18.7827	17.6353	14.8028	23.4527	12.4994	18.9375	18.795	17.9953	24.8854	22.489	28.3684	24.2985	24.6942	29.1998	30.3599	18.8703
D-Glyceric acid	189	5.73888	5.29778	6.74972	7.9599	8.5137	5.96512	5.34389	4.42204	2.96004	2.24201	2.22114	2.02695	3.87444	5.42681	4.99149	3.98057	4.77791	4.62898	11.3105
Digalacturonic acid	204	9.87275	8.35298	9.23522	9.91895	8.11851	8.95215	8.6273	10.9175	10.345	5.02983	5.16867	5.68023	7.88298	6.19692	6.67256	6.34769	6.03913	5.94711	35.9044
Diglycerol	103	0.645921	0	0.738167	0.763953	0.739709	0.815233	0.766616	0	0.586669	0.556848	0.615149	0	0.362251	0.710663	0.696919	0.408332	0.56541	0.480473	26.8673
DL-dihydrosphingosine	204	0	0	0.278711	0	0.430689	0.443718	1.22641	0	1.64913	0.576796	0.621259	0.704144	0.320313	2.74283	1.79118	2.26098	3.50874	3.08567	44.7624
Dodecanol	243	0	0	1.72166	0	1.76917	2.62451	4.65027	7.29125	4.57109	0	0	2.72334	4.57166	0	2.9013	0	0	0	13.7303
D-Talose	205	55.4513	54.4924	56.2573	66.7218	59.734	57.0929	47.0941	44.9006	26.2993	31.7511	47.5834	28.4184	32.3913	44.5207	43.2319	31.8893	48.0035	34.4352	26.2379
epsilon-Caprolactam	142	4.32172	4.23391	3.51538	3.55439	1.36826	3.1549	2.91713	0	2.91726	3.36079	1.43634	3.31107	1.96512	1.501	1.4094	1.5798	1.18291	0.662177	20.5836
Erythrose	82	0.669727	0	0.102665	0	0.477819	0	0.574085	0	0	0.413045	0.435116	0.395566	0.452053	0.571331	0.570662	0.483307	0.560478	0.475774	26.0577
Ethanolamine	174	88.8399	85.3252	103.159	87.9547	97.7174	84.5162	75.9636	75.8873	70.4935	55.9149	54.6529	46.7535	66.1139	57.9097	61.969	54.8758	50.2492	47.2558	9.87876
ferulic acid	233	0	0	0	0	0	0	0	0	0	0.0661069	0.0686572	0.029241	0.0518374	0.0793784	0.0815468	0.0723832	0.0956785	0.0868036	29.5912
fucose	117	3.20499	3.19784	2.88335	2.63513	2.6251	2.3363	1.81115	0	0	1.09358	1.70424	0	1.10011	1.28327	1.50189	0.873393	1.21073	0.976111	21.2381
fumaric acid	204	1.00811	1.13131	1.02815	0.96068	0.840608	0.808348	0.9817	1.04033	0.72232	0.492652	0.515054	0.530795	0.537613	0.753489	0.641219	0.595938	0.700552	0.616733	30.8071
Galactinol	204	782.843	677.84	723.279	1334.66	1011.69	808.488	1855.54	2479.56	1146.05	1298.47	1243.72	1320.02	1460.67	1781.85	1628.64	1461.45	1726.21	1578.73	25.6134
Galactonic acid	205	13.5754	13.3339	13.2796	17.1082	17.6869	14.8597	17.3741	14.8577	14.3149	11.9455	7.27209	11.3869	9.96845	12.689	11.7018	14.4598	16.6699	14.7366	21.8627
Gallic acid	147	8.18762	8.55799	8.98051	6.05281	6.88956	6.16329	3.1976	2.55372	3.19099	2.56141	2.93438	1.84067	3.45574	2.20013	2.71017	2.08461	2.28853	3.04475	8.20366
gentisic acid	239	2.7617	0	6.8248	2.73903	7.58199	6.58445	4.58182	0	17.0698	29.7487	42.3533	15.9844	0	0	32.0678	23.7023	27.2759	24.884	19.816
gluconic acid	189	0.584847	0.46101	0.872841	1.09079	1.10972	0.656616	1.17613	1.26451	1.24937	0.920093	0.960696	1.46631	1.32253	1.50848	1.84873	1.00306	1.00161	1.18766	33.634
Gluconic lactone	204	0	0	0	0.802375	0	0	2.36021	0	0	1.12926	0	0.929941	0	2.24012	2.14662	0	0	1.54403	26.733
Glucosaminic acid	229	0	0	0	0	0	0	0	0	0	1.02432	1.30837	0.743086	0.42201	0.784931	0.362321	1.2759	1.6745	1.19079	30.9611
Glucose-1-phosphate	217	21.37	24.6103	19.4211	36.073	27.2206	31.7157	29.2732	40.6655	35.8451	58.8458	82.2117	38.6068	44.3676	32.9991	40.639	35.6822	48.709	44.0287	9.10399
glucose-6-phosphate	299	1.05007	0	0.924874	0.845152	1.19385	1.10952	0	0	0	0.280434	0	0	0	0.253785	0	0.286313	0.24529	0.189302	35.0312
glutamic acid	128	115.5	124.6	113.272	62.5715	67.5328	55.1445	104.031	89.1264	100.754	76.3284	79.0337	74.7477	53.2779	57.7043	53.6822	45.1059	50.7982	47.8476	18.38
glutamine	156	4.76632	3.45741	8.69405	7.08013	12.6063	6.27726	0	0	0	17.516	13.6995	10.5774	9.42453	15.5655	12.7906	24.2455	15.1286	13.3347	22.254
glutaraldehyde	186	0	0	0	0	2.83992	9.54266	0	0	0	0	0.814147	0	8.2635	17.8396	2.6815	2.34999	6.74477	1.9296	16.8623
glycerol	205	71.0214	66.1292	75.7311	69.0561	73.3541	60.6379	56.5027	56.4234	37.014	27.2082	28.7777	23.7017	40.5954	36.9677	37.096	31.7389	32.2134	31.2048	10.1068
glycine	174	10.8857	11.7	13.3396	9.57364	13.3556	9.25643	14.9583	12.8656	10.7805	14.6157	12.0745	12.6673	15.2098	17.9616	18.2968	15.3146	16.0655	15.8748	10.7063
glycocyamine	82	659.719	693.45	683.978	627.677	589.301	552.008	551.149	541.509	494.327	361.734	374.883	365.62	396.392	433.461	415.53	382.082	355.954	357.803	13.7071
glycolic acid	147	0.957091	0.871861	1.00917	1.31329	1.07691	1.09946	1.35141	3.0727	1.76675	0.96491	0.847189	0.966826	1.12916	1.17381	1.07488	1.23783	0.890384	0.916677	6.43362
gly-pro	174	0	0	0	0	0	0	0	0	0	1.55944	1.74566	1.667	0	1.18132	0	1.36053	0	1.28748	27.2816
guanine	352	0	0	0	0	2.46353	0	4.45294	0	0	2.88455	3.17158	0	9.33334	10.9049	8.89603	8.8087	9.39843	7.87986	30.5706
histidine	154	0	0	0	0	13.2372	0	0	0	0	130.63	127.438	61.9345	78.9533	88.5917	65.3422	113.338	99.5676	81.2353	25.8981
Hydantoin,-(4-hydroxybutyl)-	183	1.26508	0.813493	0.852099	0.344248	0.402662	0.40031	0	0	0	0.20685	0.175658	0	0	0.147029	0	0.133718	0	0	27.3304
hydroxylamine	119	0	0	0.0760819	0	0.0500565	0	0	0	0	0.0385696	0.030394	0	0	0.0275868	0.0535084	0.0337153	0.0258325	0	7.12893
iminodiacetic acid	232	0	0	1.63401	0	1.87528	0	1.69501	0	2.1916	1.28322	1.15139	0	2.21961	1.72156	2.37973	1.51385	1.35627	1.3652	26.8088
indole-3-acetamide	216	0	0	0	0	0	0	0	0	0	0.144999	0.35905	0	0	0.430736	0	0.305105	0.70636	0.580938	13.9042
Indolelactate	202	10.9614	9.09106	5.86289	5.92187	3.71529	7.41502	6.49389	0	7.82137	9.33943	10.4235	12.4599	11.0126	4.82993	5.40803	2.79265	5.8368	4.67289	31.9897
inosine	230	0	0	0	0	0	0	0	0	0	0.179001	0.237664	0	0	0.305453	0	0.238359	0.299871	0.238767	38.9401
Isoleucine	158	14.8938	16.4481	29.3991	7.67681	12.7999	5.85959	35.5966	30.8817	35.5487	72.9622	74.229	61.1341	19.8322	23.0296	18.7423	30.2828	33.1703	28.4604	10.4585
Itaconic acid	215	0	0	0	0	0	0	0	0	0	0.0428129	0.0649017	0	0.17427	0.198088	0.246384	0.113076	0.114989	0.13418	11.4564
kyotorphin	171	1.13804	0.74062	0.948936	1.88645	1.93077	1.69893	0.548046	0	0.544501	1.08442	1.79384	1.04288	1.20818	1.27566	1.44311	1.3771	1.65359	1.46824	16.2031
lactic acid	117	3.83838	3.59847	4.79243	3.77191	6.61508	3.32677	3.43211	3.27602	3.25103	2.15804	2.34529	1.89746	3.12086	3.07094	2.91943	2.18387	2.43379	2.16472	6.19481
L-dopa	218	1.23111	0	1.85717	1.61055	2.18225	1.40975	3.29057	0	1.83722	1.80821	1.63473	1.83748	2.03088	2.94005	3.01768	3.02498	3.30499	3.44328	16.0864
Leucrose	204	1.91458	1.01054	1.65462	0.983155	2.92541	0.47829	0.769997	0	0.0885842	0.10036	0.848373	0.222503	0.850974	2.84217	1.25596	0.985502	0	1.71826	41.859
Levoglucosan	204	0	0	0	0	0.49976	0.432837	0	0	0.793603	0.61456	0	0	1.39389	0	2.37965	0	0	1.05148	19.378
L-Malic acid	233	396.512	398.344	429.552	476.597	404.167	336.564	134.312	119.646	113.491	68.2068	67.9995	69.7409	42.6244	45.2479	48.4067	86.2261	69.421	74.169	15.0853
L-Threose	73	0	0	0	0	0	0	2.16726	0.862889	0.648595	0.796095	1.00507	1.08118	0	1.14782	0.899742	1.09874	1.86108	0.664204	42.8896
lysine	174	14.5421	13.0644	17.5606	12.7393	16.7696	11.7687	19.324	12.9043	16.2291	44.2499	47.5456	38.8698	36.9869	32.9221	28.4775	37.5745	38.2221	33.5405	25.9088
Maleamate	151	0	0	0	0	0.429692	0	0	0	0	0.2473	0.276212	0	0.181982	0.298783	0	0.225585	0.212172	0.064786	6.84983
maleic acid	73	16.315	15.1914	17.5938	0	16.5505	15.2884	0	0	0	8.7319	10.2069	0	7.82487	10.0591	9.50202	2.89654	2.61938	2.27365	37.0332
Maleimide	154	0	0	1.01142	0	2.00673	0	0	0	0	0.84358	1.24792	1.44864	1.06339	0.986152	1.28776	1.4331	1.36592	1.59788	6.69939
malonic acid	305	26.387	17.081	18.1616	60.5208	40.4158	32.1781	58.0953	36.8492	27.725	139.969	167.538	87.5432	103.884	187.42	107.749	192.757	272.012	233.732	26.221
maltose	102	0	0	0.827439	0.594686	1.32117	0.581936	0.964018	0.00176658	0.977055	1.38574	1.45007	0.875931	0.970887	1.68625	1.57702	1.66988	1.92357	1.67174	36.3099
maltotriose	204	8.94132	9.07994	7.6027	8.05293	6.29355	4.15077	7.75445	11.5512	4.69148	7.17525	6.31237	7.04096	8.84524	10.5639	11.0505	11.5377	13.6798	12.2716	38.2449
mannitol	306	28.2715	21.9776	28.4477	61.4556	46.4724	38.0234	130.903	120.406	76.8364	99.3383	104.939	98.2261	107.382	143.465	124.942	109.277	156.652	132.338	25.5839
Melatonin	232	0	0	0	0	0	0	0	0	0	0.354693	0.208261	0	0	0.421904	0	0.432386	0.463419	0.53981	14.4659
melibiose	204	23.0742	25.1058	20.5894	15.4468	16.1804	17.2107	11.1137	12.8564	10.4554	5.43545	8.48441	6.70543	6.36034	7.07862	8.58858	5.38715	6.54972	5.27564	40.7467
methionine	128	1.20638	0	2.0882	0.511133	1.25712	0.476099	3.28265	2.26779	3.32662	8.66447	7.97176	6.89637	3.96581	4.29083	3.6053	4.01591	3.39534	2.90311	15.6736
Methoxamedrine	141	0	0	0	0	0	0	0.315505	0	0	0.237239	0	0	0	0	0	0.21291	0.173492	0.164446	7.23727
Methyl Phosphate	89	1.16068	0.690556	1.40168	0.841081	0.969183	0.559976	0.836852	2.27588	0.558966	0.862894	1.23426	0.449877	1.35582	0.639483	0.785811	0.457258	0.531453	0.450037	8.24052
Methyl-beta-D-galactopyranoside	204	22.046	17.1348	29.3719	19.5555	22.6011	13.4328	28.5983	54.7227	22.5081	16.7688	18.8191	14.8471	24.5506	20.105	20.363	17.3444	13.5315	42.6815	23.894
Methylmalonic acid	147	8.22068	7.74987	10.9296	5.46878	5.24663	4.54128	2.41887	2.14734	2.09725	0.946035	0.962393	0.838531	2.39352	2.75779	2.67777	1.08237	0.796774	0.75629	11.064
Mono(2-ethylhexyl)phthalate	221	0.566221	0.642388	1.05343	0.592669	0.535085	0.41211	0.806458	0	0.587235	0.350372	0.356973	0	0.655807	0.737347	0.747658	0.203438	0.184397	0	8.4504
mucic acid	73	5.34792	5.15696	6.54576	4.89889	5.93723	4.27533	7.60146	5.80536	6.42532	5.13112	5.42309	4.93429	5.10626	6.74608	6.23233	6.49445	6.94961	6.82459	29.2615
myo-inositol	204	292.481	283.334	303.595	254.313	231.67	270.603	349.934	366.703	353.994	185.232	179.76	183.178	189.804	190.155	192.34	170.759	190.543	176.239	24.1838
N-(2-hydroxyethyl)-iminodiacetic acid	114	0	0	0	0	0	0	0	0	0	0.796511	0.880609	0.781547	0	0	0	0.454803	0.755443	0.723892	17.2152
N-(3-aminopropyl)-morpholine	127	0	0	0.472962	0	0.389473	0.229296	0	0	0	0.146493	0.0931446	0.104695	0.162812	0.13057	0.184848	0.134019	0.116568	0.128291	6.48268
N(alpha),N(alpha)-dimethyl-L-histidine	53	0	0	0.100818	0	0	0	0.148285	0	0	0	0	0	0	0	0	0.0250342	0.0385364	0.0496254	9.79241
N-Acetyl-beta-D-mannosamine	246	0	0	0	0	0	0	0	0	0	0.0977874	0.0220197	0.118492	0	0.157903	0	0.219504	0.253989	0.221414	30.5535
N-Acetyl-L-glutamic acid	216	0	0	0	0	0	0	0	0	0	0.203932	0.224668	0	0	0.170256	0	0.226983	0.42621	0.297037	35.7929
N-Acetyltryptophan	202	0	2.11144	1.52457	2.16186	1.5648	0	1.66819	3.94169	1.72438	2.52957	2.68188	0	4.6969	4.28315	3.8561	4.70387	3.07289	2.80223	30.4741
N-alpha-Acetyl-L-ornithine	174	1.83591	1.55818	1.98267	1.28265	1.5988	1.38205	1.12085	0	0.924553	0.983361	0.970476	0.926755	1.16169	1.0841	1.11444	0.830508	0.776298	0.834367	14.1769
naphthalene	128	0	0	0	0	0	0	0	0	0	0.123963	0.10289	0.133433	0.0670442	0.0675705	0.0712838	0.102321	0.0650902	0	7.9996
naringin	183	0.285806	0	0	0	0	0	0	0	0	0	0.221892	0	0.6255	0.308346	0	0.324842	0.321504	0.230575	46.4527
N-formyl-L-methionine	129	0.893867	0.727244	1.01234	0.815259	0.816964	0.665475	0.53278	0.522394	0.543664	0.371207	0.339911	0.312991	0.460262	0.361578	0.438691	0.32561	0.269449	0.265742	7.66243
nicotinamide	135	0	0	0	0	0	0.454535	0.60266	0.904138	0.484895	0.276295	0.225417	0.343241	0.35034	0.344244	0.379522	0.403267	0.24428	0.275311	9.41628
nicotinic acid	78	0	0	0.278169	0	0.269378	0	0	0	0	0.257097	0.283528	0	0.357337	0	0	0.328503	0.342224	0.371831	10.3578
Nicotinoylglycine	207	2.6777	2.77263	3.22709	3.03493	2.90763	2.61919	2.15564	3.06564	2.18757	1.10265	1.26371	1.2731	1.53403	1.05057	1.61706	1.08357	0.83953	0.598797	5.87895
N-Methyl-DL-alanine	130	0.648711	0.400444	0.671477	0.47281	0.581001	0.373482	0.907666	0.450797	0	3.51148	3.46337	3.31419	0.898239	1.05082	1.05581	1.03254	1.47197	1.29409	8.11225
N-Methyl-L-glutamic acid	288	0	0	0	0	2.84169	0	0	0	0	1.09715	1.08444	1.07028	0	0.863965	0	0.908841	1.01769	0.970264	19.5167
noradrenaline	174	0	0	0	0	0	0	0	0	0	0.103297	0.118084	0	0.160363	0.166603	0.192716	0.124781	0	0.120586	31.5464
Norleucine	158	14.296	14.6547	25.9869	8.49428	14.6776	6.28646	33.1951	30.5305	28.3429	51.9124	49.007	40.6323	14.7442	18.8605	15.1432	22.5561	23.7366	21.0438	9.99893
O-acetylserine	186	0	0	0	0	0	0	0	0	0	0.145556	0.145492	0	0.143504	0.739623	0.469405	0.65903	0.632373	0.726986	15.4505
O-Phosphorylethanolamine	205	0.786499	0.546347	0.679581	0.562764	0.865718	0.634658	0.943568	0	0.709579	0.642624	0.6159	0.600618	0.64316	0.754259	0.695464	0.6483	0.862142	0.797107	22.6218
ornithine	142	1.19516	0	0	3.74401	4.0255	4.54005	3.28482	0	4.50503	20.2778	23.8024	15.0212	17.5309	15.1359	13.9262	23.5579	22.1174	21.7164	18.2036
O-Succinylhomoserine	128	0	0	0	0	0	0	0	0	0	0.324256	0.127895	0.218611	0	0	0	0.260887	0.138774	0.215375	9.17163
oxalic acid	229	0	0	0.958074	0	0	0	0	0	0	0	0	0	0	0.914563	0.858635	0.735152	0.80371	0.776386	21.6862
oxoproline	156	18.4614	16.7353	18.7118	12.1936	16.4013	13.9404	56.3449	44.2276	51.8859	47.2329	61.5227	46.4604	51.118	59.6648	63.7452	40.7215	73.4728	65.0784	15.737
palatinitol	204	3.28381	3.2866	4.67441	3.06257	3.86347	4.00632	7.94483	8.0281	7.6509	7.03128	7.40374	6.25308	3.66374	6.81583	6.5148	5.89551	7.44257	7.18243	39.0303
palmitic acid	132	0.552241	0.428847	0.360875	0.318589	0	0.228351	0.44581	0.206231	0.33302	0.163175	0.143251	0.174087	1.33037	0.452325	0.463397	0.243514	0.213436	0.209527	28.4019
pantothenic acid	157	0	0	0	0	0.148485	0	0	0	0	0.148451	0.150139	0	0.131803	0.141004	0.167616	0.056066	0.0742964	0.0751362	27.6422
phenylacetaldehyde	193	0	0	0	0	0	0	0	0	0	0.164953	0.431565	0	0	0.153097	0	0.11173	0.0980234	0.137924	43.9978
phenylalanine	218	0	0	0	0	0	0	0	58.0961	61.9142	0	1.69027	150.721	74.9108	0	82.4345	77.3805	0	2.10729	18.361
phosphate	299	2477.03	2757.76	2145.75	2212.41	2131.15	2318.61	841.864	926.697	923.557	596.516	650.778	573.973	1089.33	761.266	790.789	697.897	558.858	552.558	10.0939
phthalic acid	119	0	0	0	0	0	0	0	0	0	0.0471705	0.0464841	0	0	0.0561875	0	0.0358336	0.0402096	0.0410786	7.75585
Phytol	143	0	0	1.21797	0.887079	1.00995	0.850248	0.944399	0	0.757119	0.505709	0.664065	0.528727	0.764153	0.800999	0.82772	0.605243	0.505636	0.466278	17.0708
phytosphingosine	204	9.06194	7.37394	10.1365	7.21693	10.0288	8.09815	13.3526	14.8491	12.0746	12.0294	11.6134	8.70461	10.4983	10.7202	11.0561	12.4653	14.1835	13.1885	29.803
Pipecolinic acid	156	0	0	0	0	0.675689	0	0	0	0	1.57808	1.31025	1.37999	2.08865	3.47326	2.8355	3.388	3.55841	3.49395	11.9294
proline	143	4.43599	5.10918	9.82272	2.14136	6.08788	2.50487	52.6939	53.1842	57.3952	211.905	203.043	199.376	82.0173	154.973	120.061	224.634	263.319	251.047	10.5029
putrescine	174	4.07773	0	1.80817	0	0	0	4.30992	7.17081	3.69962	4.69247	3.7097	6.5841	4.49041	3.67267	4.00509	3.42688	3.7294	3.51449	24.0443
Pyruvic acid	174	0.712086	0	0.703777	1.51273	1.65615	0.829018	0.612343	0	0.298328	0.167816	0.244391	0.136312	0.295947	0.30041	0.338102	0.213762	0.328146	0.313326	6.0133
quinic acid	204	155.891	130.419	148.113	80.1204	69.4173	82.8655	84.536	78.0053	72.7711	36.1254	35.8258	31.776	47.6778	27.3176	33.0692	26.086	23.2258	22.1249	24.8532
ribose	103	6.79801	6.04002	6.64525	5.6819	7.59674	6.16319	7.32172	6.59955	2.54491	2.41537	4.08764	2.18295	8.06914	6.72831	7.19939	3.82165	5.16864	3.53397	20.2696
ribulose-5-phosphate	191	0.234109	0.324948	0.168097	0.281572	0.262784	0.257695	0.293107	0.451515	0.204102	0.0415914	0.117438	0	0.216542	0.177224	0.137494	0.191061	0.0483808	0.152141	36.5544
Saccharic acid	73	7.46392	7.3545	9.23247	8.32226	7.90297	7.19565	6.81003	7.09899	6.21856	4.91887	5.27954	4.54158	4.95826	5.90923	5.89874	6.14796	5.30083	5.03606	28.5263
Sedoheptulose	204	3.57733	2.55428	3.07948	3.93597	2.64386	3.13201	5.86953	4.45054	5.53643	5.94847	5.9153	5.78579	9.88654	10.5332	9.63156	8.31553	8.05806	8.60737	35.0825
serine	204	54.3018	43.3545	92.8809	76.9413	135.149	64.0812	262.39	219.085	250.056	508.174	496.848	452.028	138.425	182.644	154.109	217.538	257.284	250.853	11.9749
shikimic acid	204	74.0643	60.8887	71.9129	27.7187	29.029	28.7195	47.8903	37.6675	39.7636	32.1327	30.1584	25.971	69.0849	51.1248	66.1241	53.5934	40.546	42.41	23.4273
spermidine	174	0	0	0	0	0.304083	0	0	0	0	0.283052	0.365842	0.309351	0.155326	0.198271	0.210458	0.293827	0.355424	0.279892	33.1398
stearic acid	132	0.620501	0.455624	0.401606	0.381821	0.320922	0.254038	0.467188	0.458046	0.406707	0.229734	0.24521	0	1.71949	0.793368	0.724481	0.342234	0.280899	0.419874	32.5875
succinic acid	147	22.3744	18.3906	28.3037	15.4506	15.4147	17.071	13.8928	13.3113	12.268	7.26215	6.55511	5.67968	14.6068	14.1549	15.3876	13.8229	14.1435	13.4705	10.7903
sucrose	73	68.0328	109.816	35.2389	281.323	389.153	1000.5	89.2668	76.6876	1087.88	767.206	851.566	1335.03	683.169	574.264	671.307	1120.16	1107.18	1230.07	40.3843
sulfuric acid	82	0	0	0	0	0	0	0.229635	0	0	0.178658	0.17355	0	0	0.197089	0.209623	0.193794	0.177626	0.184695	26.7871
Tagatose	189	35.4126	36.2605	35.591	49.7309	47.3327	44.4687	26.1309	24.3744	17.2717	26.4209	33.6717	24.996	24.7329	31.6242	32.3673	27.7745	35.1415	27.9006	25.2366
tartaric acid	219	184.021	186.387	197.993	199.148	169.64	149.575	134.817	138.451	112.164	80.4082	87.8707	88.9135	111.21	108.992	101.671	110.79	100.735	104.437	17.7287
Threitol	205	17.5713	16.2722	15.6147	29.6524	30.5608	25.5286	30.6049	24.7748	24.7797	13.6515	14.3746	13.6704	11.45	16.1662	16.3508	19.6139	24.4547	22.4969	17.651
threo-beta-hydroxyaspartate	218	190.483	173.657	193.809	213.73	228.62	117.892	632.434	558.797	214.66	209.417	225.247	188.504	297.374	412.243	378.516	191.671	229.717	212.662	18.634
Threonic acid	205	2.41422	2.48493	3.95977	2.30515	3.48388	3.02359	1.37332	0.886922	1.32462	2.96005	4.08568	2.57068	3.92805	4.30476	3.74261	3.52468	2.76263	2.22428	37.2524
threonine	219	22.9706	20.3367	27.782	20.3539	29.9725	21.1536	27.1078	21.7447	27.98	68.9065	69.4023	59.2441	22.517	22.9877	21.0431	27.7631	31.0599	28.6031	12.6026
thymine	255	0	0	0	0	0	0	0	0	0	1.22783	1.27727	0	1.19757	1.4697	0.939584	1.43167	1.62686	1.36271	20.0172
trans-4-hydroxy-L-proline	218	21.7951	22.3919	34.5299	20.1562	23.7552	20.0224	3.17269	0	5.57423	11.5053	9.82768	7.62396	8.8088	9.69247	9.11877	8.4236	4.82917	4.03483	22.4949
tryptophan	202	6.08297	3.27048	11.9304	13.2121	28.0671	22.2001	7.10276	0	12.614	88.9958	98.8887	77.697	84.366	43.2934	35.4914	64.8516	53.356	48.1505	32.4046
tyrosine	226	87.3869	112.847	116.213	91.827	108.414	110.224	82.139	78.5472	93.4548	62.3504	62.467	56.077	81.2329	59.1653	68.2407	54.5953	41.7535	38.43	21.9023
uracil	99	0	0.33581	0.306142	0.482393	0.347222	0.557245	0.616219	1.25835	0.721563	0.292434	0.267075	0.421508	0.420527	0.317162	0.451005	0.275416	0.32284	0.376762	11.397
uracil-5-carboxylic acid	230	0	0	0	0	0	0	0	0	0	1.05057	1.11836	0.834084	1.02398	1.39331	0.963733	1.5307	1.58783	1.32671	27.291
urea	189	3.92674	4.47691	7.02627	9.86356	16.4979	7.924	20.3433	19.2432	16.3875	38.9032	28.2934	41.6407	17.257	26.9431	17.2441	37.0267	35.5727	42.617	9.3385
valine	144	44.9045	46.9793	70.8361	25.3056	41.3877	22.7971	76.6944	61.2067	75.5527	194.745	175.383	166.119	38.995	43.6192	42.523	76.043	85.7908	76.308	8.90774
xylitol	217	1.41295	1.3056	1.39563	0	1.11043	1.01577	1.41157	0	1.1461	0.908204	0.893805	0	0.880821	1.05538	0.94165	0.841915	0.988362	1.10103	21.3474

## Sheet: Root
Peak	Mass	CKR1	CKR2	CKR3	CKR4	CKR5	CKR6	NaClR1	NaClR2	NaClR3	NaClR4	NaClR5	NaClR6	RecoverR1	RecoverR2	RecoverR3	RecoverR4	RecoverR5	RecoverR6	RT(min)
proline	142	45.8374	49.6238	38.5195	50.094	62.3384	23.6589	892.026	883.004	767.992	961.855	990.397	904.264	552.787	499.43	493.5	767.439	796.705	428.989	10.4942
2-mercaptoethanesulfonic acid	84	0	0	0	0	0	0	7.12549	7.06245	6.78551	8.0881	8.54672	9.96755	8.89179	8.81523	8.64822	17.2666	15.5756	0	7.97825
valine	144	45.466	47.1346	39.7129	64.4146	69.0036	25.5673	158.245	163.714	145.498	168.675	157.947	133.074	106.277	103.354	112.608	134.408	145.606	86.4706	8.90653
Citramalic acid	147	0	0	0	0	1.15973	0	3.37258	3.5947	2.80685	3.49097	2.71386	3.5556	4.45426	4.4475	4.95734	4.04613	0	0	14.6386
asparagine	132	3.23524	4.08737	0	9.95125	11.2796	3.82301	201.407	194.958	196.22	129.229	132.681	195.955	381.84	372.035	322.253	51.1245	32.2929	0	19.676
myo-inositol	219	23.3973	25.5803	29.0394	37.2571	40.2211	22.4356	106.217	106.276	114.529	82.8652	85.5755	113.255	47.1239	47.872	55.2385	57.9519	54.9085	86.1523	24.1273
uridine	217	0	0	0	0	0	0	7.87037	9.67379	10.3202	12.4349	11.8521	6.71979	11.8298	11.024	14.3059	73.6713	65.5296	73.0359	35.9779
phenylalanine	218	40.6483	43.1331	46.0351	30.3909	47.7734	17.7388	92.1259	102.204	92.8852	116.465	100.038	108.159	74.0083	64.4452	71.5722	37.4407	36.7741	0	18.3807
glycocyamine	172	93.2916	87.0799	81.5719	287.974	310.944	159.439	728.754	728.597	766.393	775.516	767.008	1001.07	390.265	387.434	474.024	1147.8	1079.12	965.393	13.6902
Isoleucine	158	47.3262	45.4721	41.807	43.7342	37.1697	16.6366	117.308	122.228	106.01	122.529	113.424	87.9576	91.4916	87.4152	97.2853	99.8832	104.188	0	10.452
phosphate	191	1028.22	1113.2	1058.95	931.962	895.821	720.182	255.843	277.497	355.461	444.436	533.239	539.988	365.587	386.344	445.332	365.856	314.1	282.558	10.1129
leucine	158	38.4686	38.9456	32.4406	41.0281	47.7096	13.3947	85.5813	95.5561	78.8632	81.4683	78.0399	65.4225	101.111	96.8333	103.955	201.309	207.117	99.7662	9.99868
glutamic acid	128	45.231	49.7089	46.7185	49.231	105.863	38.1432	136.086	139.138	128.65	191.287	180.711	185.784	103.838	99.8414	120.804	153.911	152.066	28.988	18.361
Methyl-beta-D-galactopyranoside	204	38.0318	32.0796	35.2284	37.3056	32.4414	20.0222	14.4022	13.2395	16.3924	15.9563	12.344	10.2823	7.39954	20.5633	12.1007	11.1932	29.6444	0	20.6555
citric acid	141	5.94301	5.82873	5.71529	10.8335	10.9065	5.59503	17.9353	17.7788	20.1444	28.8252	27.3414	28.6774	10.8415	10.4904	13.3764	7.26114	6.40018	5.42391	23.671
oxoproline	156	38.1426	49.5172	59.8916	50.8218	45.7628	23.9382	109.712	101.793	92.1088	73.0453	79.6062	100.023	56.5313	61.5669	67.9381	49.7881	39.6696	0	15.735
serine	219	2.7901	3.30517	2.49096	7.50617	11.3797	2.76579	35.0496	38.332	32.8141	20.887	20.3234	18.8553	11.4061	11.1054	11.3577	19.3794	19.6446	2.90012	11.9669
gluconic acid	219	0	0	0	0	0.660422	1.97823	3.9104	4.47478	4.2648	9.0233	8.44577	7.113	2.21665	1.91757	4.04121	20.4473	19.7295	12.2475	28.2551
beta-Mannosylglycerate	204	18.7153	19.0956	22.062	22.3795	25.9034	16.3409	7.57613	11.2687	12.195	13.6867	12.9276	11.5687	11.4308	14.7287	13.5997	10.3384	11.676	0	23.8753
D-Glyceric acid	189	3.92136	2.02094	0	3.6834	4.08173	2.14512	5.91032	6.04727	5.98873	7.87165	7.48843	7.67135	6.60114	6.94988	7.85382	6.2747	5.67127	0	11.3107
Gallic acid	147	4.12139	3.41901	4.8448	4.73377	8.51825	3.9139	7.97827	10.3199	11.3832	11.8803	14.9994	12.2652	8.92284	11.3701	11.8673	11.6393	12.9502	12.408	8.20315
threonine	219	13.3529	13.1141	11.1532	24.1313	29.0053	9.86291	32.1576	34.872	32.0389	35.6516	35.7638	32.7635	29.6652	29.8824	29.8217	43.8377	47.0415	20.7564	12.6009
Digitoxose	219	0	0	0	0	0.842743	0	2.29607	3.06362	2.8956	7.13418	7.28133	5.48836	13.6638	13.7543	13.7114	49.1277	45.961	55.8163	39.4987
D-(glycerol-phosphate)	299	12.9912	0	0	11.6335	11.7103	5.52912	22.9549	25.848	24.8338	54.7037	48.7702	40.9498	49.9306	52.2173	56.5743	54.894	50.1789	0	22.3066
sarcosine	116	36.3339	34.3436	28.0487	100.895	107.661	34.6611	129.515	134.928	116.175	179.862	153.85	132.339	67.5071	61.6456	85.1803	237.258	258.632	163.934	6.90795
Nicotinoylglycine	207	14.7989	15.3753	15.5429	17.6224	17.0465	10.7228	7.88331	7.94654	9.12791	9.69827	11.8432	10.7728	10.7231	9.66232	10.0529	9.73877	10.5293	0	5.37643
beta-Alanine	174	0	0	0	0	0	0	4.01953	4.13163	4.25755	5.56769	0	5.22637	2.85404	2.94873	3.50179	6.62737	6.09865	0	13.4083
5-hydroxytryptophan	73	18.9459	18.512	16.3078	32.0568	36.5744	19.5621	38.8865	42.4375	36.9784	51.3939	42.0559	43.1163	63.2647	64.7133	55.0555	23.0748	27.9085	0	31.0908
Pipecolinic acid	156	0	0	0	1.23814	2.16751	0	6.6991	6.78132	3.07195	14.5662	9.43874	13.988	7.74169	7.30551	6.78382	22.9134	27.6142	0	11.9283
guanine	352	0	0	0	0	0	0	9.49878	11.7636	10.0518	0	15.8841	14.9693	8.77974	7.2711	0	0	0	0	30.5704
Ethanolamine	174	431.187	393.659	348.632	541.86	573.684	284.654	206.533	235.999	263.51	205.146	206.444	232.173	266.614	277.443	273.085	297.949	303.105	268.193	9.87727
methionine	128	3.57443	0	0	2.65238	6.47489	1.17395	9.36678	9.52917	5.23092	10.4043	6.9328	6.78024	15.1772	14.3748	12.347	12.8839	12.9857	0	15.6686
3-hydroxybutyric acid	191	0	0	0	0	0	0	0.456296	0.498828	0.564262	1.58375	1.61542	1.05497	0	0	0.472123	0.778342	0.770368	0	7.89283
Threonic acid	102	0	0	0	0	2.81934	0	3.03497	2.95192	2.0899	4.75433	2.48929	2.3919	3.65288	3.59178	3.02148	0	0	0	36.3059
urea	189	18.3105	30.8536	39.5623	42.8283	0	14.8505	59.0451	55.175	43.4816	86.6624	58.9554	53.5489	115.533	120.101	149.117	64.6675	61.3129	0	9.52399
1-Aminocyclopropanecarboxylic acid	221	0	0	0	0	0.554948	0	0.414637	0.427691	0.524063	0.357774	0.641888	0.662754	0.483358	0.516375	0.607205	0.667498	0	0	8.76343
flavin adenine degrad product	189	0	0	0	0	0	0	0.930179	0.83912	1.04354	0.554535	0.368746	0	1.22658	0	0.793892	1.69377	1.50145	0	18.7598
lactic acid	207	5.79726	8.91935	11.5636	6.1632	5.29884	5.11631	2.40682	2.04366	2.90046	2.5347	3.81038	3.83075	2.67697	2.6171	3.45878	3.49414	2.68498	0	6.18826
Itaconic acid	147	7.18789	9.77144	8.09023	7.42516	7.6196	4.86777	47.9348	48.1117	52.4056	175.326	158.913	163.964	35.863	33.3983	53.8353	26.7808	25.0868	0	11.4575
Galactonic acid	205	34.724	34.7732	38.1731	42.7702	42.496	25.5407	21.4255	20.2759	20.7779	30.1175	28.6155	25.6824	19.3087	19.5742	23.3777	13.0691	0	0	25.3329
tryptophan	204	7.97601	3.38079	1.50496	2.73602	7.62812	0.886342	9.01276	9.32421	7.02428	15.5794	16.0178	18.9403	21.4119	17.9915	17.7715	3.21631	2.42658	0	32.4064
N-Methyl-DL-alanine	130	2.19366	0	0	3.15119	3.0002	1.29586	3.3458	3.33836	3.79661	7.48179	6.72562	5.9615	1.53348	0	2.22008	0.843649	2.11529	0	8.11262
Cysteinylglycine	168	2715.57	2630.06	2224.72	1860.41	2216.41	1300.99	1441.96	1396.67	1679.45	467.252	486.964	533.223	1775.85	1679.14	1427.53	409.836	430.37	0	21.9571
trehalose	191	7.13631	7.66329	10.9984	9.23936	9.5886	4.55052	41.2834	33.2494	40.9582	142.211	110.543	84.0571	21.2474	18.9699	43.0619	86.9912	72.7565	134.54	41.8289
Allo-inositol	299	5.20055	4.49607	5.09147	5.50042	7.82411	3.21912	10.2895	10.2909	9.10985	9.52742	7.93413	5.50146	7.99537	10.117	9.70264	4.26707	3.87765	0	36.5533
palatinitol	204	36.4578	42.1454	53.2896	43.0634	38.4542	23.9835	29.8257	28.7634	27.4959	12.6737	10.7115	10.9265	21.2761	21.9992	19.989	4.73499	3.51526	0	39.029
2-hydroxybutanoic acid	219	7.79463	7.45163	7.62672	10.1549	12.0411	6.40037	4.46294	5.68594	5.09405	5.86254	5.98176	5.7302	5.36593	7.05213	7.58421	3.08582	3.97322	0	24.7146
Sedoheptulose	204	1.82273	0	0	2.43786	0	1.02414	4.57319	4.40365	2.88379	15.1017	13.5892	9.86882	22.808	18.1164	17.884	19.2262	17.1819	0	19.326
22-Ketocholesterol	173	0	0	0	0	0	0	2.90661	2.86026	2.60499	13.9989	10.0737	7.62306	0	0	0	0	0	0	37.7124
Aminooxyacetic acid	146	19.7889	13.0974	10.036	21.6603	20.2125	7.94766	6.89926	6.90518	5.35383	9.04295	8.14829	7.13101	5.44837	9.49046	9.64202	20.7541	23.4308	94.8627	7.5656
Galactinol	204	259.82	279.743	332.311	302.455	180.408	87.5224	150.338	78.3658	57.7622	178.953	65.0309	68.7796	114.518	95.0268	71.7588	74.3455	81.8202	65.8252	25.5906
2-Deoxy-D-galactose	245	1.66607	0	0	2.68061	3.44663	2.28847	2.54469	3.76479	4.12637	8.46588	9.98553	9.6629	11.2986	11.8871	10.3691	3.07109	6.63289	0	35.3406
malonic acid	147	9.29849	9.19716	16.4082	8.70586	6.48826	7.47152	17.0125	17.4683	19.8803	37.4281	49.5483	57.6748	26.7222	27.6672	31.0489	50.192	40.5893	20.5802	6.65265
alpha-ketoglutaric acid	156	1.33212	1.12016	0	1.98866	3.01986	1.33625	2.33446	2.42742	2.61184	5.4825	5.30927	5.39194	1.42253	1.41505	2.37777	6.86669	7.26559	0	17.2479
Glucose-1-phosphate	217	134.478	157.099	186.342	139.014	109.677	80.0948	66.0197	80.536	100.848	71.924	84.5397	98.5733	79.0458	87.8986	86.9056	89.7933	107.395	365.105	9.10877
5-Aminovaleric acid	174	81.3564	105.352	127.312	40.868	32.1506	45.4779	12.9983	14.2792	23.4492	18.2888	27.388	31.4934	31.0509	31.52	33.2655	14.2969	10.1281	0	24.0247
sorbitol	219	2.33333	2.01597	2.23821	2.02203	2.20254	1.46372	1.31687	1.26399	1.61532	1.60998	1.85859	1.65868	1.99483	1.95697	2.05384	0.880573	1.00398	0	20.6917
N-alpha-Acetyl-L-ornithine	70	0	0	0	0	0	0	11.017	10.781	51.7252	7.18345	66.886	63.0387	0	0	24.8177	37.7195	10.3299	0	8.13676
ribose	146	78.9805	58.9789	50.9943	113.79	2.90096	58.343	10.9434	11.1943	20.1916	3.77743	25.5804	19.8164	23.6696	25.6628	21.613	25.5172	24.469	439.202	20.3045
2-hydroxy-3-isopropylbutanedioic acid	73	13.5888	9.80237	12.131	15.2666	16.9901	8.81934	9.14359	7.1673	8.13322	10.4391	9.74985	8.64259	11.418	13.3526	10.774	11.0309	11.5871	0	26.7311
naphthalene	128	0	0	0	0	0	0	0.701411	1.31649	1.79278	1.33533	0	0	0	0	0	0	0.531647	0	14.7987
Cinnamic acid	205	0	0	0	6.04536	4.75274	4.59374	4.64101	4.37697	4.96446	14.1422	13.6108	10.7565	6.45274	5.86027	8.53888	7.53001	5.90077	0	16.1492
histidine	154	0	0	0	0	0	0	22.6556	25.5576	0	0	38.7763	49.3047	211.805	193.612	161.153	102.856	99.037	0	25.8757
threo-beta-hydroxyaspartate	218	48.6688	49.4139	44.1665	19.0183	40.7331	12.4517	85.4187	90.9474	77.6065	520.539	460.892	439.549	131.125	125.287	170.823	67.6848	72.7634	0	18.6068
4-Vinylphenol dimer	191	0	0	0	0	0	0	2.44321	3.61771	0	4.19839	0	1.57651	0	0	0	0	4.59545	0	9.83758
3,4-dihydroxycinnamic acid	219	7.70113	6.69594	6.38994	8.04953	8.04925	5.47636	9.28698	9.73554	9.7837	17.2975	28.3278	28.5891	13.5637	11.6552	13.3385	17.808	9.77308	0	30.66
Tagatose	103	22.5444	62.6062	57.4864	134.668	115.802	60.1186	140.595	187.534	70.348	648.377	666.42	495.394	233.033	237.1	145.783	1285.25	1338.11	1298.98	25.222
fucose	117	11.4148	8.80467	8.95017	11.38	13.1995	6.49574	9.21276	12.3397	14.0663	19.9165	22.4163	17.7702	18.0825	18.3641	22.9448	39.4043	36.1003	18.9862	21.2358
1,5-Anhydroglucitol	219	0	0	0	0	0	0	0.190003	0.139399	0.0800642	1.48565	1.36529	0.801127	0.739075	0.720936	0.728289	4.37471	3.58366	2.44036	42.1275
tyrosine	226	694.578	543.374	576.886	639.515	719.155	310.843	335.408	344.64	374.165	459.333	462.294	481.879	507.618	534.66	502.526	524.634	569.102	1317.18	21.8994
2-amino-2-methylpropane-1,3-diol	218	0	0	0	0	0	0	17.2354	25.015	2.54356	14.1526	0	3.43412	35.3907	29.1674	6.6595	1.39454	13.5383	0	14.0636
cytidine-monophosphate degr prod	217	0	0	0	0	0	0	1.40466	2.79971	2.29262	0.820475	0	0	4.72438	5.02092	4.79966	18.4698	16.6099	0	45.0377
O-Phosphorylethanolamine	299	14.7726	13.6073	14.0658	11.611	12.41	5.7521	13.9691	13.5906	14.0667	18.7888	19.2703	21.5295	19.7608	20.0719	23.251	16.6814	14.7463	0	22.6124
Saccharic acid	102	5.80013	0	0	8.1075	9.14349	5.55109	7.77867	10.4942	9.26619	74.5448	71.5747	87.3978	53.3589	56.7946	69.5347	80.1586	74.819	57.2035	25.3221
mannitol	205	5.85392	6.4499	7.31778	8.48377	8.49896	5.09527	22.6174	22.2262	22.0743	271.226	220.97	168.285	21.808	18.2997	60.9729	80.8535	68.4419	75.8305	26.5688
6-Methylmercaptopurine	221	0	0	0	0	1.56336	0	0.692123	0.843244	0.969892	0.966387	0.947343	1.09103	1.09549	0.926781	1.09825	1.27488	1.40798	0	11.1
Fructose,6-biphosphate degr prod	299	4.91385	0	5.04112	7.03494	9.40233	3.92994	7.0814	7.56806	8.40005	8.83542	8.35932	9.88354	6.0772	6.66468	7.85545	6.9238	6.81014	0	35.0313
glycine	174	19.0489	16.6331	18.1733	24.3813	21.2035	10.6102	19.0293	20.311	21.6819	38.516	40.2658	35.1349	25.2923	24.4786	33.6399	50.7866	54.048	0	10.7071
Pyruvic acid	174	0	0	0	2.4571	2.33687	8.52613	4.6301	3.68525	3.64055	10.431	9.79257	8.10452	5.95926	6.35592	8.77106	22.0946	29.3984	0	6.0183
1-Kestose	217	25.5189	28.6522	34.7915	49.2578	16.5241	6.43356	22.8264	10.412	4.93014	18.4957	0	0	10.0026	6.43662	5.4028	3.6481	8.58243	0	23.4675
D-Arabitol	205	1.24986	0	1.22212	1.00723	0.925278	0	1.62256	2.09093	1.69578	28.8203	25.9326	21.4071	0.785555	0	6.18547	1.91653	1.68059	0	21.338
glutaraldehyde	146	0	0	0	0	0	0	0.889372	0.666555	0	2.13129	0.880339	0	2.09294	0	0	0	0	0	16.9033
Biuret	172	0.271979	0	0	0.800632	1.04154	0.36711	0	0	0	0	0	0	6.74332	6.38438	6.25801	0	0.954274	0	20.8346
Lactobionic Acid	204	0.190701	0.108348	0.0842186	0.158797	1.70926	0.0380727	0.634997	1.67306	0.296887	15.3685	11.6317	11.4385	3.02151	3.17731	6.92253	31.3066	26.1506	0	43.131
D-Talose	73	39.3445	35.4766	38.0871	56.2572	67.3233	32.8621	42.8642	56.7392	55.6174	191.6	187.94	132.836	96.9167	112.874	136.77	275.028	270.018	267.557	26.2269
Methyl Phosphate	133	11.5235	7.72795	8.58623	15.0942	16.9822	8.03506	10.2167	19.2081	16.9984	19.879	18.7613	13.5482	10.1552	18.7557	17.0699	14.168	22.0921	0	8.24058
pantothenic acid	157	0	0	0	0	0	0	0.409155	0.390195	0	0.457336	0	0	0	0.464747	0.695328	0	0	0	27.6398
O-acetylserine	174	0	0	0	0	0	0	0.358287	0.403099	0	0.44003	0	0	0	0	0.185779	2.4893	3.25332	0	12.6998
nicotinic acid	78	0	0	0	0	1.75969	0	2.21282	2.39503	2.1684	2.91842	0	0	1.9391	1.24338	0	0	0	0	10.3567
stearic acid	132	17.7777	10.6561	10.181	4.08664	3.50389	2.03859	1.54771	1.63139	1.76806	2.98808	3.4695	4.48682	3.55381	2.39155	2.50901	2.67213	1.61068	0	32.5865
Allantoic acid	243	30.2296	28.9709	26.7237	29.2015	37.8641	17.6424	29.394	25.8203	28.7281	86.9284	84.2576	90.1232	113.557	110.148	115.916	0	0	0	25.2306
palmitic acid	132	15.431	10.0649	8.69302	3.54517	3.09906	1.95099	1.13848	0.868967	1.16875	2.0857	3.66959	5.25106	3.11329	2.08694	2.31089	3.74004	1.61626	0	28.3964
sucrose	219	576.252	756.444	1019.3	689.624	600.194	482.758	536.545	529.96	723.494	246.3	321.728	453.334	398.819	392.254	388.558	351.239	294.665	1070.32	40.3961
Nicotianamine	68	0	0	0	0	0	0	0.348953	0.309647	0	0.539542	0	0	0	0.464478	0.25089	0	0	0	38.0984
1-Methylhydantoin	116	256.525	186.522	159.804	304.425	301.377	136.855	134.058	154.67	147.735	176.489	183.094	164.074	160.064	157.678	170.841	221.042	227.159	663.33	7.2428
epsilon-Caprolactam	95	5.5086	7.87083	8.90313	1.25883	2.29027	0	1.51276	1.79229	1.13002	0.702418	0	1.83056	1.18333	1.3348	2.28995	2.33689	0	0	20.5694
Acetylsalicylic Acid	83	0	0	0	0	0.453846	0	0.297605	0.3413	0.257851	0.376341	0.319189	0	0.327256	0.323689	0.323305	0	0.341453	0	5.41211
DL-dihydrosphingosine	204	1.5224	0	0	2.78016	4.86212	3.47215	4.3901	4.99192	14.6559	4.25104	0.730491	16.5087	9.4864	10.2199	6.25928	10.1412	8.76508	0	40.0712
oxalic acid	189	0	0	0	0	0	0	0	0	0.366577	0	0.441527	0.793519	0	0.911305	0	0.551538	0	0	18.9814
2,2-Dimethylsuccinic Acid	73	0	0	10.6575	13.8395	0	7.40259	18.7361	21.8579	23.5966	5.57716	6.35416	6.95132	5.91794	5.93622	7.54701	5.59071	0	0	19.9655
alpha-D-glucosamine-phosphate	128	0	0	0	0	0.613776	0	0.661861	0.659333	0.615686	0.66817	0	0	0	0.690275	0	0	0	0	31.0672
Monostearin	57	0	0	0	0	0	0	0.166044	0.247853	0	0.362248	1.13807	2.52801	0.924817	0.733545	0.715705	1.57005	0.481553	0	41.6282
D-Fructose,6-bisphosphate	299	0	0	0	4.03689	4.84347	0	4.10729	4.64449	4.57849	4.72384	4.26812	0	3.75062	0	4.28844	3.79476	3.48099	0	34.8161
D-alanyl-D-alanine	189	0	0	0	0	0.189019	0	0.617058	0.581504	0	0.384926	0	0	0	0	0	0.245829	0.280907	0	11.8516
phytosphingosine	204	15.7333	8.96796	10.651	13.4291	8.60752	4.30563	14.6143	10.2442	8.70427	30.0552	23.5111	15.1186	5.21303	6.05283	8.18423	5.83194	4.38648	0	33.7934
1-Monopalmitin	57	0	0	0	0.508955	1.23983	0.647188	0.684708	0.692088	0.32692	1.01483	2.4295	4.43913	1.9603	2.02845	1.72664	2.93084	1.89719	2.60021	38.7688
lactitol	218	5.53704	4.6899	0	6.34071	7.56521	4.09412	2.57102	2.87536	2.39192	3.06415	2.94616	2.9661	3.13496	2.97474	3.5605	2.57279	2.52312	0	24.612
beta-Glycerophosphoric acid	299	0	0	0	1.85508	1.29659	0	1.58758	1.44991	1.37745	1.78645	1.42234	0	1.39981	1.51192	1.5897	1.65507	1.46122	0	32.7601
glutamine	156	0	0	0	0	18.3219	0	24.4158	23.1682	19.6929	7.7309	0	0	3.26601	3.26738	3.15386	0	0	0	22.2395
tartaric acid	219	154.217	143.945	119.681	156.498	176.197	98.318	107.79	110.75	117.55	134.249	133.855	121.551	90.4183	98.3025	115.915	69.7099	57.8713	49.2193	17.7214
Phenylacetic acid	91	0	0	0	0	0	0	0	0	0	4.04721	3.77927	0	0	0	1.95651	5.15258	4.82541	0	10.4388
Halostachine	116	0	0	0	0	0	0	0	0	0	1.0559	0	1.17129	0	0	0.373172	1.48653	2.38323	0	7.48352
2-ketobutyric acid	245	0	0	0	0.431881	0	0	0.403686	0.405447	0.192689	0.48296	0	0	0.29673	0.317385	0.380378	0.279081	0.18444	0	6.86432
L-Malic acid	189	29.7165	25.6604	20.6098	63.5908	75.2222	35.7271	21.75	21.4004	21.3143	36.8672	31.495	30.9008	8.03454	8.69188	11.6039	7.11241	6.54986	0	15.0654
indole-3-acetic acid	202	0	0	0	0	0	0	0	1.3733	0	2.22254	0	0	7.15332	7.66614	8.03964	12.3148	9.12022	0	26.6636
2-Deoxyerythritol	89	0	0	0	0.591385	0.276618	0.162077	0.0857148	0.0721198	0	0	0	0	0	0	0	0	0	0	21.5665
norvaline	144	0	0	0	0	0	0	0.641855	0.332381	0	2.32388	0	0	3.91357	3.63752	0	1.09316	7.42427	0	26.3914
2-aminoethanethiol	130	42.9792	30.3784	24.0965	49.2674	53.3005	24.4679	25.7066	27.5905	26.172	33.3228	34.2236	29.9225	32.6179	34.151	34.6787	37.1723	40.0973	91.8512	6.09259
Cumic Acid	221	0	1.04778	0	4.44291	4.01273	0	2.49636	2.34612	2.66351	3.00589	3.19045	3.08925	3.23695	3.32609	3.5069	3.29473	3.78771	0	6.33799
glucose-6-phosphate	299	1.27447	0	0	3.4771	3.02095	0	3.51779	2.67618	2.90249	3.10231	2.40423	0	0.548108	2.92307	0	1.49747	2.09934	0	35.3262
5-Methoxytryptamine	120	0	0	0	5.51381	1.47616	0	2.55775	3.41658	7.77779	6.21961	0	0	3.30583	3.88037	6.69371	0	0	0	16.2506
putrescine	174	8.86128	3.59142	0	15.6503	9.45484	0	11.9973	12.1295	5.18062	14.5198	11.4761	6.19524	16.7163	15.0114	17.8745	29.3839	27.8899	0	7.79948
lysine	174	229.14	224.587	211.987	90.2366	151.876	79.8501	99.9512	109.991	114.185	118.824	135.512	171.166	236.627	216.11	217.231	77.7188	56.7062	0	25.8906
alpha-Aminoadipic acid	128	1.70482	1.73949	0.971381	0	0	0	0.431453	0.633836	0.868975	1.99521	2.17517	2.21428	1.11023	0	1.68998	1.20137	1.01685	0	20.8199
mucic acid	219	1.1243	1.12194	0.565153	1.35789	1.78155	0.886057	1.03169	0.911419	0.841057	2.43865	2.18692	2.202	1.59583	1.52976	2.2138	17.2744	15.7741	11.8819	29.2578
creatine degr	147	11.7977	14.2097	12.8844	15.3352	11.5469	7.0081	13.8357	12.9028	11.6904	10.685	19.4558	20.2745	20.3783	19.0095	13.7561	22.2941	13.0488	51.4142	6.43774
uracil-5-carboxylic acid	168	0.951309	0	0	0.774196	1.03377	0	2.56792	2.31658	1.9285	0	0	0	1.5089	1.90282	0	0	0	0	27.2846
ornithine	142	0	23.8086	27.3753	0	16.6731	12.659	12.5071	13.6835	16.5651	19.6574	23.6264	33.5358	49.4164	44.6389	43.0479	47.3599	41.7396	0	23.3862
kyotorphin	144	0	0	0	0	0.113159	0	0.110179	0.0498026	0	0.238318	0	0	0.344834	0	0	0	0.531004	0	32.2594
succinic acid	147	19.7518	18.632	14.6199	50.599	50.1579	19.9607	28.6325	28.4488	28.3164	48.5299	44.9074	47.341	12.6029	12.4137	19.0849	43.1989	47.0355	49.7369	10.7945
glycerol	119	7.14134	0	4.25034	4.09823	8.9995	3.2639	4.40067	3.83397	3.18031	5.69638	10.7733	14.1675	7.03401	9.66275	10.3038	12.3822	12.5299	33.0613	45.8038
aspartic acid	130	25.1409	18.8705	10.8002	24.8199	12.4016	21.2099	9.06415	11.1504	24.0331	27.9791	43.1799	36.6447	6.66955	4.53556	20.1052	42.7446	23.9343	16.787	13.313
nornicotine	191	0.409818	0	0	0	0.579534	0	0.286111	0.37326	0.301178	0.396654	0.40485	0	0.367544	0.346554	0.381679	0	0.449894	0	7.71154
Leucrose	217	6.17133	9.9323	9.40004	11.5355	7.86149	4346.09	6.32864	7.22495	3.93853	3.44173	2.77296	1.23694	4.17301	11.4022	4.52168	3.61323	11.5613	19.4308	38.5348
cis-gondoic acid	56	3.18305	0	0	1.87563	0	0	0	0	1.79397	1.582	3.50365	3.18602	0.800408	0	2.92042	2.49798	1.14975	0	12.9533
quinic acid	204	5.75885	6.52584	0	7.13366	5.93364	2.94673	3.92968	2.10919	2.99209	3.39829	4.28058	4.5458	4.18713	3.78095	4.40214	7.53047	7.89703	0	24.8324
Acetol	174	0	0	0	0	22.8425	59.3982	2.96018	0	0	0	0	18.3159	0	0	4.87001	3.66611	2.8655	0	23.6136
beta-hydroxypyruvate	147	14.0348	12.4055	13.3664	17.7186	18.6751	9.41825	11.2412	11.8829	11.7309	14.6934	14.3039	12.8913	15.5625	16.2759	15.4276	16.9301	16.6005	43.6814	5.7677
Digalacturonic acid	204	7.46375	10.8725	12.3723	14.0442	10.5068	4.22527	9.82457	6.37361	6.85893	12.1352	7.46557	6.84889	10	7.54798	8.16076	4.39509	4.45692	0	35.9058
isocitric acid	204	3.06136	0	0	13.7456	7.47776	3.8738	13.7747	5.32634	20.0082	11.8476	0	0	6.38734	4.43877	3.70186	2.11902	3.5377	0	23.74
3,4-Dihydroxypyridine	168	1260.7	1348.73	1646.25	1289.82	1011.57	475.116	1645.59	1455.81	1141.84	293.355	417.931	409.464	948.714	1065.18	931.527	243.274	243.261	0	16.6964
N-Acetyltryptophan	174	5.38713	0	0	6.21571	5.90391	1.96981	3.63378	3.763	4.33729	4.28684	5.32257	4.90033	4.30216	4.60627	4.85498	5.10472	4.90715	0	8.87477
ribulose-5-phosphate	299	0	0	0	0	1.13957	0	0.775328	0.878915	0	0.965738	0	0	0	1.25542	0	0	0	0	30.8286
cytidine	217	0	4.49844	3.02716	0	0.315514	4.27944	0.0596193	0	0	0	2.5696	3.57013	0	0	2.20001	0	3.31565	0	16.7359
3-hydroxy-L-proline	230	0	0	0	0	5.06278	0	3.37005	3.47211	0	4.05196	0	0	0	0	0	8.41267	8.82829	0	15.9655
Dodecanol	243	16.9048	23.3371	29.8889	0	11.6775	14.3162	9.78441	8.66936	14.3873	8.99423	15.5377	17.999	17.435	15.6904	14.9652	16.4049	14.2966	133.559	13.7324
N-Acetyl-beta-alanine	129	6.41315	2.66949	1.08974	8.49125	7.00513	3.4464	3.32834	3.52849	3.48003	4.31516	4.53823	5.18147	3.35437	3.71305	3.77232	4.65998	5.03756	0	6.27829
3,6-Anhydro-D-galactose	89	4.12578	0	0	4.44023	5.76881	0	2.08026	3.03743	4.17157	0	0	0	0	0	0	0	0	0	22.3625
Methylmalonic acid	206	0	0.323857	0	0	0	0.0905737	0	0.183199	0	0	0	0	0.00413394	0.000213123	0	0	0	0	23.6102
1,3-diaminopropane	172	0	0	0	0	1.10445	0	0.0732197	0	0	0.348812	0	0	6.50121	6.81627	6.18086	2.13761	2.06116	0	18.8837
Indolelactate	73	7.51243	7.21816	9.13966	4.24428	4.28924	7.46996	3.75672	2.98863	3.27263	5.98834	8.45015	10.2796	6.80635	6.90933	8.47664	0	0	0	31.9858
3-Phenyllactic acid	119	1.52043	0	0	0	1.054	0	0.449679	0.598192	0	0	0.97721	1.89057	1.03744	1.03366	0	2.26298	0.786908	0	44.001
N-methyltryptophan	73	4.73124	3.55892	0	2.71891	5.62963	2.49207	3.50023	3.1484	0	7.01213	4.7464	4.76974	1.16108	4.39412	5.28281	5.10713	3.38158	0	29.8327
fumaric acid	73	10.9274	8.43088	6.81009	11.787	14.9896	10.9483	8.28461	8.22359	10.4303	14.6582	5.31414	11.4733	7.50305	7.00686	8.96888	5.64156	4.8604	0	16.4261
Phytol	143	0	0	0	0.664867	0.375267	0	0.326381	0	0	0	0.456503	0.795505	0.557519	0.483155	0	0	0	0	12.4798
hydroxylamine	119	0	0	0	0.416514	0.47802	0.234039	0.271603	0.281089	0.263734	0.292784	0.31274	0	0.399582	0.262317	0.353534	0	0.324344	0	7.12963
alanine	144	0	0	0	0	1.71352	0	0.776004	0.842914	0	1.05858	0	0	0.954106	1.03621	0	0	1.28033	0	8.09752
4-hydroxycinnamic acid	219	3.32528	0	0	0	3.17911	1.36867	2.5609	2.30424	2.51042	2.77028	0	0	2.20231	1.99308	2.09693	2.14914	1.51478	0	26.0097
D-erythro-sphingosine	204	32.1521	15.7698	0	36.6165	32.0369	18.7899	20.4709	10.9829	19.107	17.9959	23.8927	26.9531	71.2053	14.0262	85.4233	20.8863	24.5384	85.4502	18.8698
cycloleucine	141	0	0	0	1.07264	1.12394	0.530675	0.598823	0.677169	0	0.753706	0	0	0.608361	0.658799	0.802003	0.745401	0.814181	0	10.2077
benzoic acid	77	1.91854	0	0	2.12957	1.88566	1.01983	0.869719	1.07697	1.30423	1.27221	2.11268	1.41207	2.12107	0	0	0	0	0	9.41955
citrulline	142	8.6527	10.9224	2.23565	5.08368	12.3509	5.80644	4.97494	5.13171	5.26042	7.68148	6.73832	10.7454	12.4704	10.9233	11.1579	11.0859	9.17611	0	23.5324
5,6-dihydrouracil	171	4.12775	0	0	5.68349	6.35744	4.5996	2.72947	2.15118	0.548012	5.80073	6.31339	6.605	7.03274	5.81869	6.34941	3.66132	2.13336	0	7.15146
dibenzofuran	168	2.66237	0	0	2.08661	2.00145	1.22882	0.917675	0.981622	1.38063	1.18534	1.25331	1.42443	1.13646	1.18578	1.14399	0.994133	1.46552	0	5.26167
N-Ethylglycine	130	1.45428	0	0	1.77272	1.46759	0.862976	0.856097	0.930563	1.22348	1.03935	1.01812	0.99314	1.17545	1.22715	0.880948	1.49738	1.35066	0	8.42122
3-Aminoisobutyric acid	102	0	0	0	0.927388	3.23033	0	0	0	0.699494	0.5968	0	4.19399	0	0	2.72065	1.1067	0.600474	0	40.336
noradrenaline	174	0	0	0	15.0413	6.54367	0	0.345453	4.74324	10.1868	1.64951	0	0	46.5954	64.2578	50.1007	40.5404	41.6723	0	20.395
N-Methyl-L-glutamic acid	72	0	0	0	3.68607	3.0175	0	0	0	0	2.09311	6.61478	0	3.95042	5.10311	5.2943	0	0	0	23.6478
3-Methylbenzyl Alcohol	219	0	0	0	0	0.207841	0	0	0.117438	0	0.159948	0	0	0.173528	0.196065	0.191435	0	0	0	13.1772
caffeic acid	219	0	0	0	0	0.317945	0	0.417699	0	0	0	0	0	0.33057	0.772435	1.19303	0.583188	0	0	18.0848
Threitol	205	0	1.86126	0	2.1519	2.45879	1.11663	0	1.76758	0.829128	1.86789	2.22952	1.47896	1.68587	2.6028	3.06755	5.02684	5.6179	0	26.8642
adenine	219	6.75597	0	0	9.26125	12.9386	7.18587	4.91682	6.36902	6.29058	6.57363	7.17751	7.06608	7.47349	8.26451	8.85316	4.56562	4.61916	0	24.3265
4-aminobutyric acid	174	52.5019	53.8795	41.9237	67.9879	55.6514	43.4924	23.0812	36.2272	56.3875	58.6141	87.3714	63.7931	29.5022	30.8697	69.2094	128.197	115.621	86.463	15.94
maltotriose	204	158.894	151.079	182.177	178.054	155.379	80.1118	103.179	159.223	113.283	216.736	185.647	148.846	187.838	175.602	185.592	223.664	282.411	79.1077	37.0662
N-(3-aminopropyl)-morpholine	128	1.79429	0	0	2.261	2.47326	0	1.15715	1.29526	1.03868	1.39848	2.12448	0	1.13613	1.29995	1.05583	1.32579	1.6641	0	6.48776
Carbazole	167	308.987	353.85	280.605	311.644	289.403	121.935	442.673	494.085	471.631	81.9068	72.2647	60.0615	266.963	300.239	240.74	0	55.6344	0	16.8429
Mono(2-ethylhexyl)phthalate	221	0	0	0	0	1.0633	0	0.383045	0	0.201741	0	0.237007	0.178617	0.52125	0.383377	0.692707	0.627898	0	0	5.86083
2-Hydroxybiphenyl	98	0.0545308	0	0	0.0382573	0.412679	0.0240594	0.0903656	0.0945071	0	0.107464	0.0475557	0.197514	0.121307	0.25003	0.0799236	0.177879	0.395005	0	9.77191
Dithioerythritol	221	2.76254	0	0	3.14004	2.28747	3.41872	1.534	1.52308	1.99555	1.40922	2.5926	2.50789	1.96912	2.06248	2.24304	2.25036	1.69456	0	8.45049
